# Supplementary material for: Gender-Related Differences on Polyamine Metabolome in Liquid Biopsies by a Simple and Sensitive Two-Step Liquid-Liquid Extraction and LC-MS/MS
Source: PubMed Central journal article supplement (PMC6995533; doi:10.3390/biom9120779), 2019-11-26

### **Supplementary data**

**Table S1.** Intraday (repeatability) and interday (reproducibility) precision for the urine matrix.

| Analyte        | Repeatability<br>(%RSD* n=5) | Reproducibility<br>(%RSD n=3) |
|----------------|------------------------------|-------------------------------|
| ARG            | 4.2                          | 6.5                           |
| AGM            | 3.5                          | 8.8                           |
| N-AcDAP        | 6.2                          | 11.2                          |
| N-AcPUT        | 9.0                          | 9.1                           |
| GABA           | 4.8                          | 19.2                          |
| N1,N8-DiAcSPD  | 5.6                          | 7.1                           |
| N1-AcIsoPUTR   | 15.5                         | 19.2                          |
| N-AcCAD        | 5.5                          | 4.5                           |
| ORN            | 5.6                          | 16.2                          |
| N1,N12-DiAcSPM | 4.1                          | 14.2                          |
| LYS            | 3.7                          | 6.1                           |
| N1-AcSPD       | 5.8                          | 17.4                          |
| N8-AcSPD       | 4.9                          | 15.6                          |
| 1,3-DAP        | 8.0                          | 16.7                          |
| PUT            | 4.7                          | 6.4                           |
| CAD            | 8.8                          | 10.7                          |
| N1-AcSPM       | 11.2                         | 16.2                          |
| SPD            | 3.2                          | 5.2                           |
| SPM            | 6.9                          | 5.7                           |

\*Relative standard deviation (RSD)

**Table S2.** Clinical characteristics of the participants included in the analysis.

|                                 | Average (SD*) |
|---------------------------------|---------------|
| Age, years                      | 65.5 (4.1)    |
| BMI, mg/kg <sup>2</sup>         | 32.6 (3.2)    |
| Systolic blood pressure, mm Hg  | 137.7 (14.7)  |
| Diastolic blood pressure, mm Hg | 75.6 (8.6)    |
| Glucose, mg/dL                  | 99.1 (7.4)    |
| HbA1c, %                        | 5.7 (0.3)     |
| Total cholesterol, mg/dL        | 200.4 (32.2)  |
| HDL-cholesterol, mg/dL          | 50.2 (11.2)   |
| LDL-cholesterol, mg/dL          | 120.6 (28.2)  |
| Triglycerides, mg/dL            | 148.0 (29.8)  |

\* Standard deviation (SD).

**Figure S1.** Comparison of the response and its variability for each extraction method assessed in serum samples.

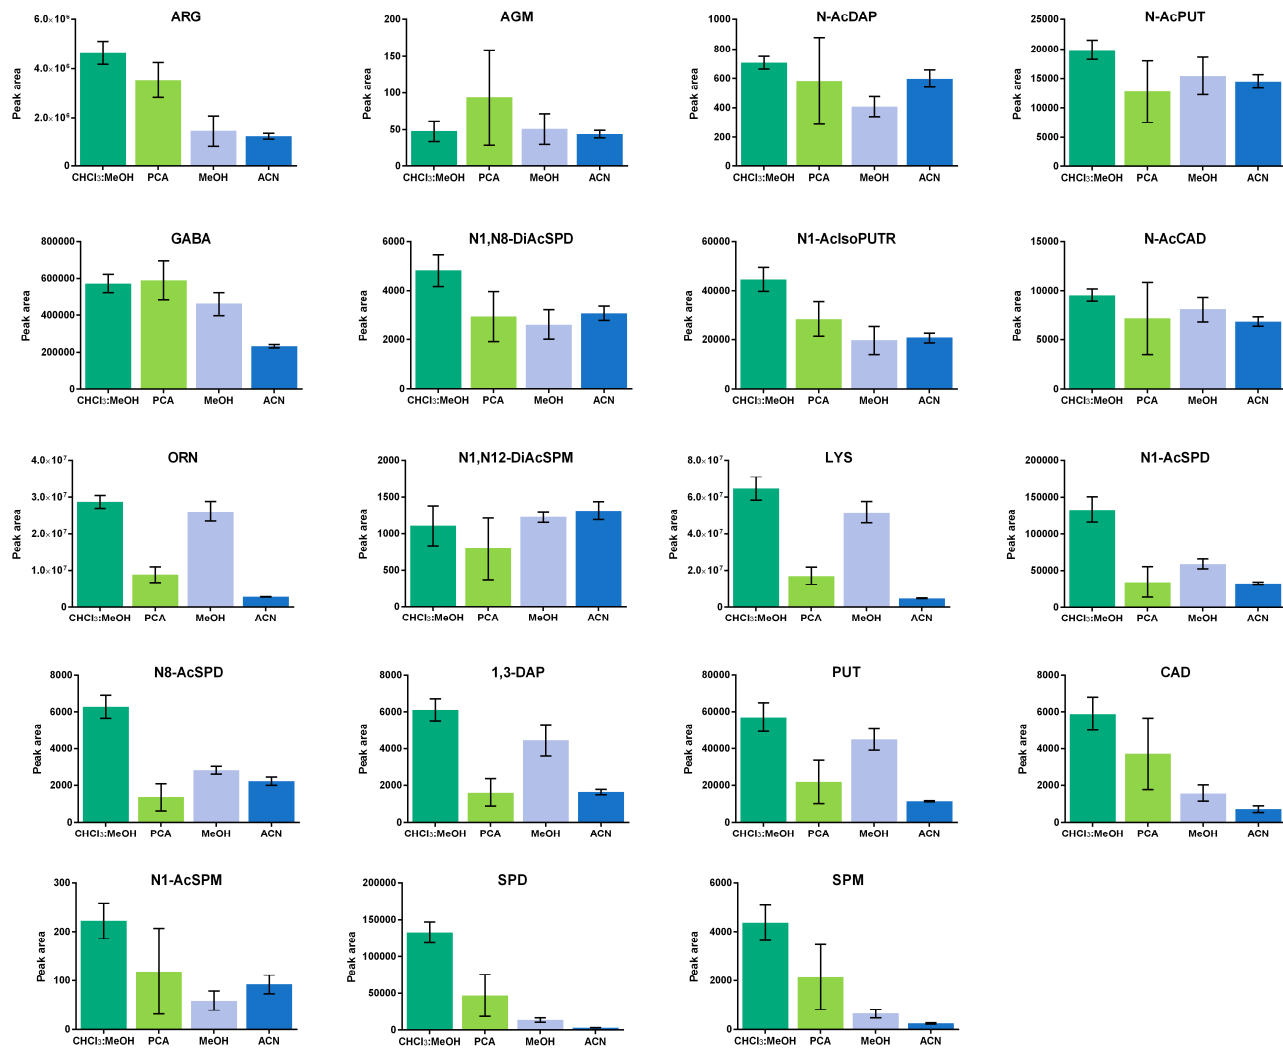

**Figure S2.** Scatter dot plot representations of the polyamine levels in the male and female groups. In all the cases represented, there were significant differences in the levels between the study groups ( $p = 0.05$ ).

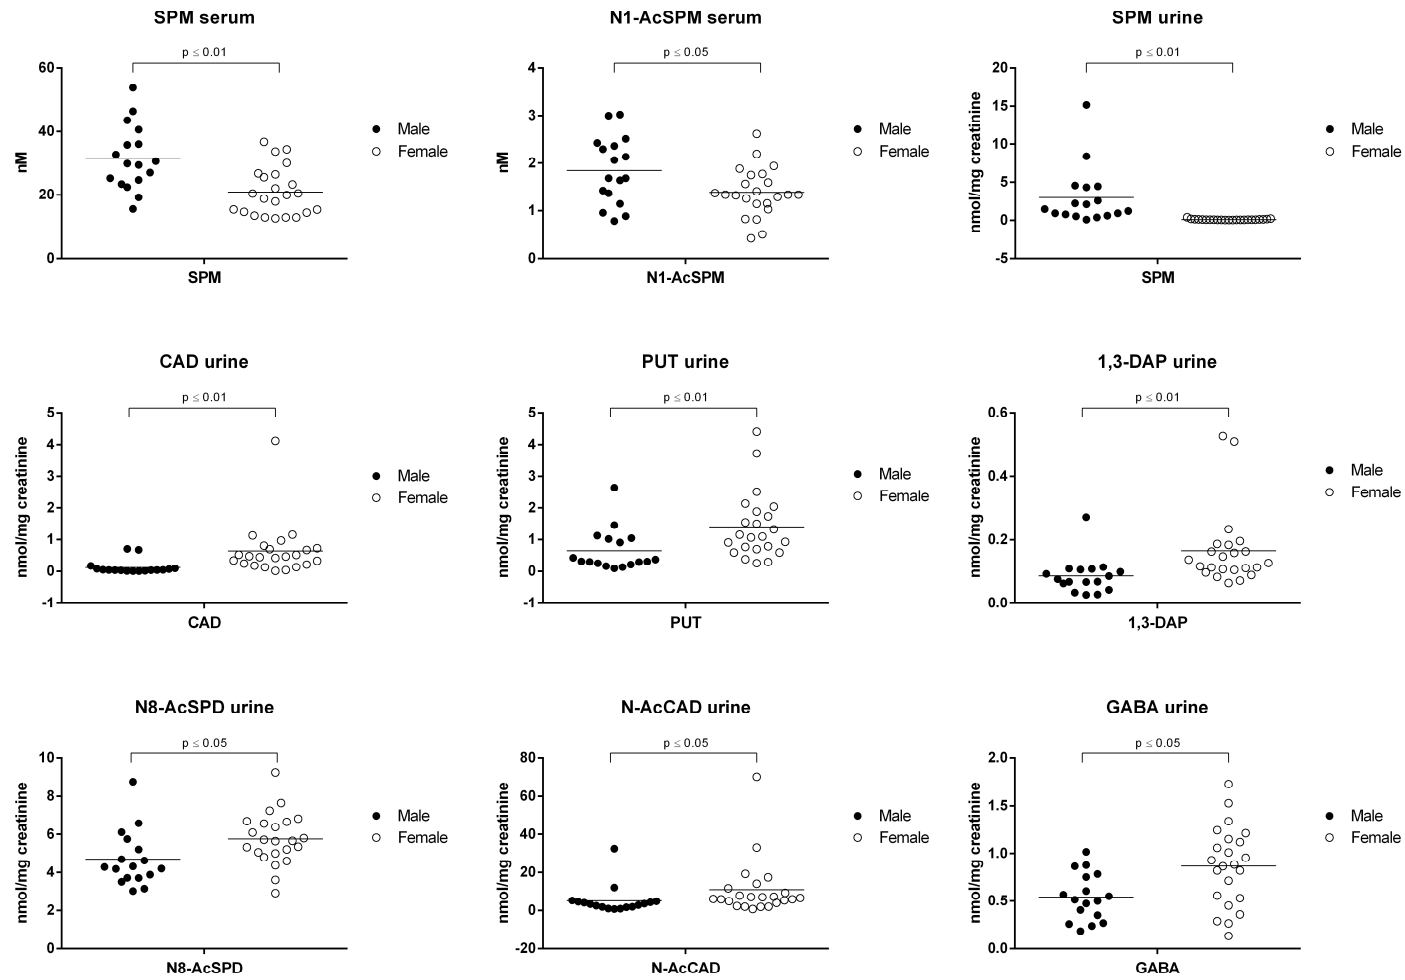

Supplement: biomolecules-09-00779-s001.pdf [file biomolecules-09-00779-s001.pdf]
